# Supplementary material for: Predictors of Arterial Stiffness in Law Enforcement Officers
Source: MDPI journal article supplement (doi:10.3390/ijerph181910190), 2021-09-28
Supplement: s1 [file s1]

Table S1. Bivariate correlation matrix of carotid-femoral pulse wave velocity verses demographic, occupational, anthropometric, and cardiovascular outcomes in 70 law enforcement officers.

|                  | Age    | LEO yrs. | Yrs. 1st Shift | Yrs. 2nd Shift | Yrs. 3rd Shift | PSQ-org | PSQ-op | PSQ-total | BMI   | % BF  | WC    | SBP   | DBP   | Aortic SBP | Aortic DBP | AIx 75 | RMSSD | HEI Total | Steps | MVPA  |
|------------------|--------|----------|----------------|----------------|----------------|---------|--------|-----------|-------|-------|-------|-------|-------|------------|------------|--------|-------|-----------|-------|-------|
| LEO yrs.         | 0.79*  |          |                |                |                |         |        |           |       |       |       |       |       |            |            |        |       |           |       |       |
| Yrs. 1st Shift   | 0.59*  | 0.68*    |                |                |                |         |        |           |       |       |       |       |       |            |            |        |       |           |       |       |
| Yrs. 2nd Shift   | 0.48*  | 0.52*    | 0.12           |                |                |         |        |           |       |       |       |       |       |            |            |        |       |           |       |       |
| Yrs. 3rd Shift   | 0.27   | 0.52*    | 0.12           | -0.11          |                |         |        |           |       |       |       |       |       |            |            |        |       |           |       |       |
| PSQ-org          | 0.19   | 0.23     | 0.14           | 0.12           | 0.20           |         |        |           |       |       |       |       |       |            |            |        |       |           |       |       |
| PSQ-op           | 0.01   | -0.01    | 0.01           | -0.08          | 0.09           | 0.71*   |        |           |       |       |       |       |       |            |            |        |       |           |       |       |
| PSQ-total        | 0.11   | 0.11     | 0.08           | 0.02           | 0.15           | 0.92*   | 0.93*  |           |       |       |       |       |       |            |            |        |       |           |       |       |
| BMI              | 0.10   | 0.19     | 0.18           | 0.15           | 0.10           | 0.07    | 0.06   | 0.07      |       |       |       |       |       |            |            |        |       |           |       |       |
| % BF             | 0.30*  | 0.34*    | 0.33*          | 0.19           | 0.15           | 0.09    | 0.06   | 0.08      | 0.86* |       |       |       |       |            |            |        |       |           |       |       |
| WC               | 0.19   | 0.31*    | 0.22           | 0.20           | 0.18           | 0.07    | 0.07   | 0.08      | 0.91* | 0.9*  |       |       |       |            |            |        |       |           |       |       |
| SBP              | 0.01   | 0.23*    | 0.21*          | 0.13           | 0.13           | 0.26    | 0.06   | 0.17      | 0.55* | 0.46* | 0.51* |       |       |            |            |        |       |           |       |       |
| DBP              | 0.16   | 0.43*    | 0.19*          | 0.32*          | 0.25*          | -0.02   | -0.07  | -0.05     | 0.6*  | 0.48* | 0.64* | 0.6*  |       |            |            |        |       |           |       |       |
| Aortic SBP       | 0.23*  | 0.47*    | 0.41*          | 0.27           | 0.22           | 0.19    | -0.02  | 0.09      | 0.67* | 0.61* | 0.64* | 0.88* | 0.76* |            |            |        |       |           |       |       |
| Aortic DBP       | 0.20*  | 0.47*    | 0.23*          | 0.33*          | 0.26*          | 0.02    | -0.08  | -0.03     | 0.61* | 0.51* | 0.66* | 0.62* | 0.98* | 0.78*      |            |        |       |           |       |       |
| AIx 75           | 0.54*  | 0.53*    | 0.40*          | 0.35*          | 0.24           | 0.02    | -0.15  | -0.07     | 0.34* | 0.44* | 0.32* | 0.08  | 0.32* | 0.47*      | 0.33*      |        |       |           |       |       |
| RMSSD            | -0.39* | -0.18    | -0.09          | -0.15          | -0.08          | -0.02   | 0.15   | 0.07      | 0.10  | 0.06  | 0.06  | 0.22  | 0.07  | 0.16       | 0.06       | -0.14  |       |           |       |       |
| HEI Total (n=58) | 0.05   | 0.08     | 0.01           | 0.06           | 0.17           | -0.07   | -0.11  | -0.10     | -0.06 | -0.21 | -0.16 | 0.01  | -0.08 | 0.00       | -0.08      | -0.06  | -0.13 |           |       |       |
| Steps (n=57)     | 0.21   | 0.20     | 0.16           | -0.01          | 0.24           | -0.05   | -0.09  | -0.07     | -0.27 | -0.20 | -0.24 | -0.22 | -0.16 | -0.20      | -0.10      | 0.04   | -0.19 | 0.41      |       |       |
| MVPA (n=57)      | 0.07   | 0.06     | 0.01           | -0.11          | 0.08           | -0.09   | -0.04  | -0.07     | -0.19 | -0.23 | -0.25 | -0.06 | 0.00  | -0.10      | -0.02      | -0.10  | -0.17 | 0.26      | 0.73  |       |
| cfPWV            | 0.57*  | 0.60*    | 0.43*          | 0.32*          | 0.31*          | 0.10    | -0.02  | 0.04      | 0.43* | 0.60* | 0.53* | 0.36* | 0.46* | 0.54*      | 0.49*      | 0.50*  | 0.54* | -0.11     | -0.12 | -0.11 |

\*Indicates significant correlation ( $p < .05$ ).

LEO yrs.: years served as Law Enforcement Officer, PSQ-org : Organizational Police Stress Questionnaire score, PSQ-op: Operational Police Stress Questionnaire Score, PSQ-total: Combined score of PSQ-org and PSQ-op, BMI: Body Mass Index, % BF: Relative body fat (%), WC: waist circumference, SBP: brachial systolic blood pressure, DBP: Brachial Diastolic Blood Pressure, Aortic SBP: Aortic Systolic Blood Pressure, Aortic DBP: Aortic Diastolic Blood Pressure, AIx75: aortic augmentation index at heart rate 75 beats per minute, RMSSD: root mean squared of successive differences, HEI Total: Healthy Eating Index Score, Steps: Average steps per day, MVPA: moderate-to-vigorous physical activity, cfPWV: carotid-femoral pulse wave velocity ( $\text{m}\cdot\text{s}^{-1}$ ).
